# Supplementary material for: SPT6 loss permits the transdifferentiation of keratinocytes into an intestinal fate that resembles Barrett’s metaplasia
Source: PubMed Central journal article supplement — iScience. 2021 Sep 11;24(10):103121. doi: 10.1016/j.isci.2021.103121 (PMC8481972; doi:10.1016/j.isci.2021.103121), 2021-09-11
Supplement: mmc1.pdf [file mmc1.pdf]

**iScience, Volume 24**

**Supplemental information**

**SPT6 loss permits the transdifferentiation  
of keratinocytes into an intestinal fate  
that resembles Barrett's metaplasia**

**Daniella T. Vo, MacKenzie R. Fuller, Courtney Tindle, Mahitha Shree Anandachar, Soumita Das, Debashis Sahoo, and Pradipta Ghosh**

## **SUPPLEMENTAL ONLINE MATERIALS**

### **INVENTORY OF SUPPLEMENTARY MATERIALS**

- 1. SUPPLEMENTARY TABLES**
- 2. SUPPLEMENTARY FIGURES AND LEGENDS**

## SUPPLEMENTARY FIGURES

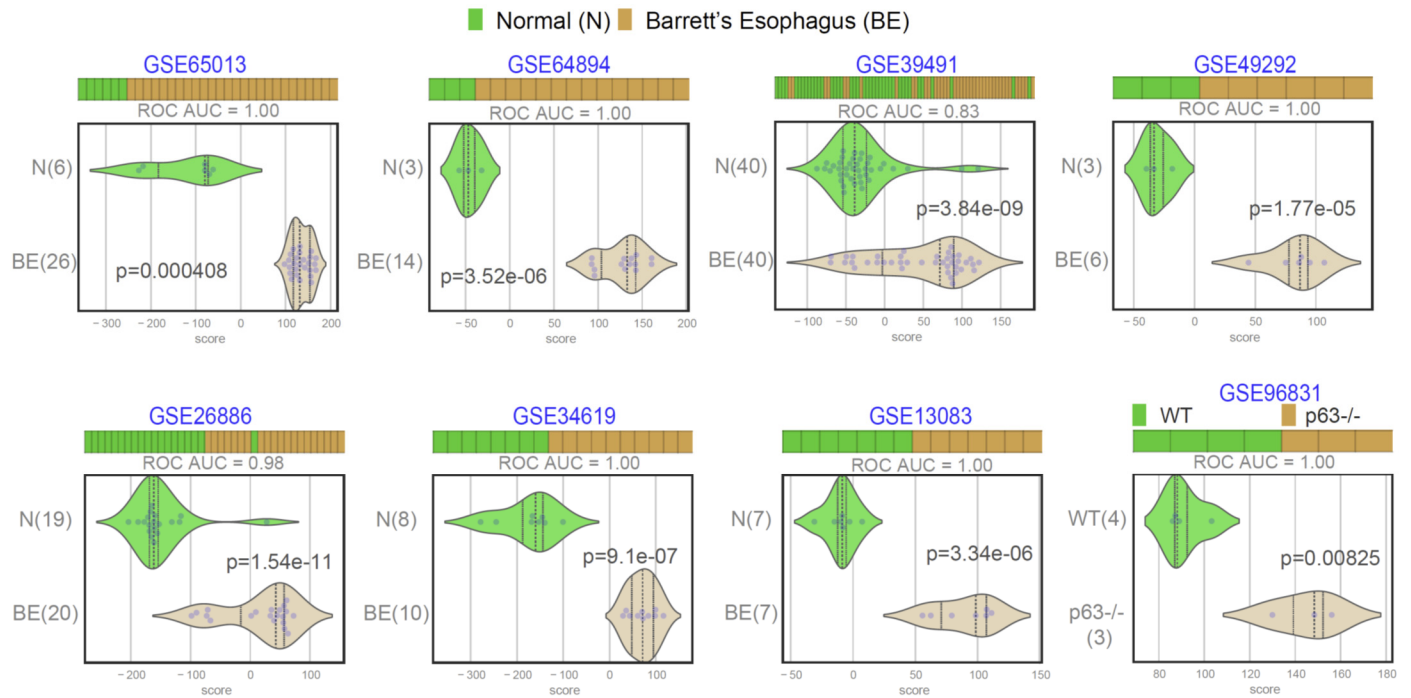

**Supplementary Figure 1.** [Related to [Figure 1](#)]

**Differentially expressed genes (DEGs) in SPT6-depleted samples recapitulate the altered gene expression patterns seen in multiple independent cohorts of Barrett's esophagus.**

DEGs from control vs SPT6-depleted samples (Li et al., 2021) were used to rank order normal (N) from Barrett's esophageal (BE) samples across 8 publicly available independent cohorts. ROC-AUC in each case is annotated.

**Supplementary Table 1 [Related to Figure 1D-G]**

**Barrett's Metaplasia Gene Signature [PMID: 16449976]**

Ref: <https://www.nature.com/articles/1209357/tables/1>

| <b>UP Genes</b> |         | <b>DOWN Genes</b> |         |          |
|-----------------|---------|-------------------|---------|----------|
| TNFRSF10C       | AZGP1   | MAL               | FDXR    | NEDD9    |
| LTA             | CREB3L1 | LGALS7            | CDA     | ANXA8    |
| ARPC3           | FOXA3   | RELN              | GPX3    | SERPINB3 |
| GAL5            | TCEAL1  | ANXA1             | CBR3    | SPRR2C   |
| TSPAN-1         | NR0B2   | ARS               | SULT2B1 | CSTA     |
| LAMC2           | CXCL3   | EMP1              | PAX9    | LY6G6C   |
| TS4SF8          | GDF15   | VAT1              | RARG    | S100A2   |
| CRIP1           | PDGFA   | ALOX12            | TRIM29  | TPD52L2  |
| TM4SF3          | GJB1    | KRT6A             | CRABP2  | CSTB     |
| KRT8            | INSR    | ST3GAL4           | MAFG    | KIAA0657 |
| COL4A2          | PNPLA2  | KRT4              | NFRKB   | PPL      |
| SERPINH1        | AGR2    | PGD               | ECM1    |          |
| LYZ             | AADAT   | KRT1              | INI1A   |          |
| CYBA            |         | FDXR              | ARF4L   |          |
| HGD             |         | CDA               |         |          |
| PSMB8           |         | GPX3              |         |          |

**Supplementary Table S1 [Related to Figure 1D-G]**

**Tissue-derived Barrett's Metaplasia Gene Signature.**

Differentially expressed genes (DEGs) from Barrett's esophagus (BE) vs. normal esophageal mucosa (NE) (Wang et al., 2006) used to rank order control and SPT6-depleted samples (Li et al., 2021) in Figure 1D-G. The p-value was <0.001 between BE vs. NE in analysis of variance (ANOVA). The FDR was <0.001 in significance analysis of microarray (SAM) with more than two-fold changes.

| <b>Supplementary Table 2 [Related to Figure 1K]</b> |               |                              |
|-----------------------------------------------------|---------------|------------------------------|
| <b>GSM ID</b>                                       | <b>GSE ID</b> | <b>Correlation Matrix ID</b> |
| <b>GSM4634684</b>                                   | GSE153129     | CTLi-1                       |
| <b>GSM4634685</b>                                   | GSE153129     | CTLi-2                       |
| <b>GSM4634681</b>                                   | GSE153129     | SPT6i-1                      |
| <b>GSM4634682</b>                                   | GSE153129     | SPT6i-2                      |
| <b>GSM3415805</b>                                   | GSE120795     | Colon-1                      |
| <b>GSM3415821</b>                                   | GSE120795     | Colon-2                      |
| <b>GSM3415854</b>                                   | GSE120795     | Brain-1                      |
| <b>GSM3415888</b>                                   | GSE120795     | Brain-2                      |
| <b>GSM3415810</b>                                   | GSE120795     | Ski mus-1                    |
| <b>GSM3415864</b>                                   | GSE120795     | Ski mus-2                    |
| <b>GSM3701297</b>                                   | GSE129153     | Adipocyte-1                  |
| <b>GSM3701298</b>                                   | GSE129153     | Adipocyte-2                  |
| <b>GSM4483226</b>                                   | GSE148818     | Trachea-1                    |
| <b>GSM4483228</b>                                   | GSE148818     | Trachea-2                    |
| <b>GSM1423129</b>                                   | GSE58963      | BE-1                         |
| <b>GSM1423130</b>                                   | GSE58963      | BE-2                         |

**Supplementary Table 2 [Related to [Figure 1K](#)]**

**Datasets used for comparing the SPT6i keratinocyte transcriptome with that of other adult human tissues.**

Selection of GSM and GSE IDs used to generate the correlation matrix in Figure 1K including SPT6-depleted and control samples, colon, brain, skeletal muscle, adipocytes, trachea and Barrett's metaplasia.

| <b>Supplementary Table 3 [Related to Figure 2A-C]</b>                                                       |                                  |
|-------------------------------------------------------------------------------------------------------------|----------------------------------|
| <b>Metaplasia-specific and intestine-specific geneset [PMID: 21703447]</b>                                  |                                  |
| Source: <a href="https://doi.org/10.1016/j.cell.2011.05.026">https://doi.org/10.1016/j.cell.2011.05.026</a> |                                  |
| <b>Metaplasia-Specific Genes:</b>                                                                           | <b>Intestine-specific Genes:</b> |
| Cyp2f2                                                                                                      | Nr5a2                            |
| Krt6a                                                                                                       | Muc3                             |
| Pax9                                                                                                        | Tinag                            |
| Adh7                                                                                                        | Afm                              |
| Upk2                                                                                                        | Hnf4a                            |
| Muc4                                                                                                        | Muc2                             |
| Sox1                                                                                                        | Cdx1                             |
| Gapbrp                                                                                                      | Isx                              |
| Upk1a                                                                                                       | Tff3                             |
| Ceacam1                                                                                                     | Lgals2                           |
| Cxcl17                                                                                                      | Cdx2                             |
| Car4                                                                                                        | Alpi                             |
| Krt31                                                                                                       | Apob                             |
| Runx2                                                                                                       | Fabp2                            |
| Krt7                                                                                                        | Lct                              |
|                                                                                                             | Apoc3                            |

**Supplementary Table 3 [Related to Figure 2A-C]**

**Genes that distinguish the metaplastic BE epithelium from the normally differentiated intestinal epithelium.**

Metaplasia-specific and intestine-specific genes used to perform GeneSet Enrichment Analysis (GSEA) on human Barrett's esophagus (BE) vs. small intestine tissue in Figure 2B and SPT6 KO vs. small intestine-derived organoids in Figure 2C.
